# Supplementary material for: Glucose Intolerance in Pregnancy and Future Risk of Pre-Diabetes or Diabetes
Source: Oxford University Press journal article supplement (doi:10.2337/dc08-0972), 2008-07-16
Supplement: dc080972-sup-online_table_-_retnakaran_et_al.xls [file dc080972-sup-online_table_-_retnakaran_et_al.xls]

## Sheet: Table 3
Online Table: Pregnancy factors predicting postpartum dysglycemia as determined by (Panel A)
multiple linear regression analysis of dependent variable log AUCgluc at 3-months
postpartum and (Panel B) logistic regression analysis of dependent variable
glucose intolerance at 3-months postpartum
Panel A:	Multiple linear regression analysis of log AUCgluc at 3-months postpartum
				Beta		t		p
Months postpartum				-0.00687		-0.75		0.4512
Age				0.00572		3		0.0028
Ethnicity:
Asian				0.07474		2.77		0.0059
Other				0.05485		2.22		0.027
Family history of DM				0.0216		1.31		0.1908
Pre-pregnancy BMI				0.00407		2.47		0.0141
Weight gain in pregnancy preceding OGTT				0.00134		0.98		0.3275
Previous GDM				0.08632		2.37		0.0181
Glucose tolerance status in pregnancy:
Abnormal GCT NGT				0.07099		3.03		0.0026
GIGT				0.14562		5.43		<0.0001
GDM				0.19904		8		<0.0001
Model r2 = 23.6%
Panel B:	Logistic regression analysis of glucose intolerance at 3-months postpartum
				Odds Ratio		95% CI		p
Months postpartum				0.78		[0.6 - 1.1]		0.1562
Age				1.03		[0.97 - 1.1]		0.3511
Ethnicity:
Asian				0.68		[0.3 - 1.8]		0.1891
Other				1.7		[0.9 - 3.4]		0.0728
Family history of DM				0.67		[0.4 - 1.1]		0.1418
Pre-pregnancy BMI				1		[0.95 - 1.1]		0.8669
Weight gain in pregnancy preceding OGTT				1.02		[0.97 - 1.1]		0.4323
Glucose tolerance status in pregnancy:
Abnormal GCT NGT				3.6		[1.01 - 12.9]		0.0489
GIGT				5.73		[1.6 - 21.1]		0.0086
GDM				14.28		[4.2 - 49.1]		<0.0001
Note: In both panels, the reference group for ethnicity is white and reference group for glucose tolerance status in
pregnancy is normal GCT NGT.
